# Supplementary material for: Comparative analysis of codon usage patterns and phylogenetic implications of five mitochondrial genomes of the genus Japanagallia Ishihara, 1955 (Hemiptera, Cicadellidae, Megophthalminae)
Source: PeerJ journal article supplement (doi:10.7717/peerj.16058), 2023-09-25
Supplement: Table_S1.pdf [file Table_S1.pdf]

**Table S1.** Mitochondrial genomes used for the phylogenetic analyses in this study

| Subfamily       | Species                          | Length (bp) | A+T (%) | GenBank accession no. |
|-----------------|----------------------------------|-------------|---------|-----------------------|
| Typhlocybae     | <i>Paraahimia luodianensis</i>   | 15,382      | 79.1%   | MN894531              |
|                 | <i>Parazyginella tiani</i>       | 17,562      | 76.4%   | MT683891              |
|                 | <i>Paraahimia luodianensis</i>   | 16,497      | 80%     | NC_047464             |
|                 | <i>Eupteryx minusula</i>         | 16,944      | 78.8%   | MN910279              |
|                 | <i>Bolanusoides shaanxiensis</i> | 15,274      | 78.9%   | MN661136              |
|                 | <i>Limassolla lingchuanensis</i> | 15,716      | 78.8%   | NC_046037             |
|                 | <i>Mitjaevia protuberanta</i>    | 15,472      | 77.4%   | NC_047465             |
|                 | <i>Empoasca flavescens</i>       | 15,152      | 78.4%   | MK211224              |
|                 | <i>Ghauriana sinensis</i>        | 15,491      | 79.5%   | MN699874              |
| Ledrinae        | <i>Tituria pyramidata</i>        | 15,331      | 75.6%   | NC_046701             |
|                 | <i>Tituria sagittata</i>         | 14,918      | 76.5%   | NC_051528             |
|                 | <i>Petalocephala chlorophana</i> | 14,927      | 76.6%   | MT610899              |
|                 | <i>Ledra auditura</i>            | 16,094      | 76.3%   | MK387845              |
| Evacanthinae    | <i>Evacanthus acuminatus</i>     | 14,793      | 78.8%   | MK948205              |
| Mileewinae      | <i>Mileewa margheritae</i>       | 15,375      | 79%     | MT483998              |
|                 | <i>Mileewa ponta</i>             | 15,999      | 79.9%   | MT497465              |
|                 | <i>Mileewa albovittata</i>       | 15,079      | 79.6%   | MK138358              |
|                 | <i>Mileewa alara</i>             | 16,020      | 77.9%   | MW533151              |
| Cicadellinae    | <i>Bothrogonia ferruginea</i>    | 15,262      | 76.4%   | KU167550              |
|                 | <i>Homalodisca vitripennis</i>   | 15,304      | 78.4%   | NC_006899             |
|                 | <i>Atkinsoniella grahami</i>     | 15,621      | 78.5%   | MW533712              |
|                 | <i>Atkinsoniella xanthonota</i>  | 15,895      | 78.5%   | MW533713              |
|                 | <i>Bothrogonia qiongana</i>      | 15,788      | 76.9%   | NC_049894             |
|                 | <i>Cofana yasumatsui</i>         | 16,011      | 77.6%   | NC_044706             |
| Megophthalminae | <i>Durgades nigropicta</i>       | 15,974      | 78.8%   | NC_035684             |
|                 | <i>Japanagallia spinosa</i>      | 15,655      | 76.6%   | NC_035685             |
|                 | <i>Japanagallia curvipenis</i>   | 15,356      | 76.3%   | This Study            |
|                 | <i>Japanagallia malaisei</i>     | 15,575      | 77.1%   | This Study            |
|                 | <i>Japanagallia multispina</i>   | 15,533      | 77.2%   | This Study            |
|                 | <i>Japanagallia turiformis</i>   | 15,717      | 76.1%   | This Study            |
|                 | <i>Japanagallia</i> sp.          | 15,396      | 77.7%   | This Study            |
| Treehopper      | <i>Maurya qinlingensis</i>       | 16,011      | 78.1%   | NC_044706             |
|                 | <i>Entylia carinata</i>          | 15,662      | 78.1%   | NC_033539             |
|                 | <i>Tricentrus brunneus</i>       | 16,467      | 78.6%   | NC_044708             |
|                 | <i>Leptocentrus albolineatus</i> | 15,508      | 78.1%   | NC_044707             |
|                 | <i>Hypsauchenia hardwickii</i>   | 15,618      | 78.8%   | NC_044705             |
| Idiocerinae     | <i>Populicerus populi</i>        | 16,494      | 77.2%   | MH492318              |
|                 | <i>Liocratus salicis</i>         | 16,436      | 77.2%   | MG813490              |
|                 | <i>Idioscopus myrica</i>         | 15,423      | 77.8%   | MH492317              |
|                 | <i>Idioscopus clypealis</i>      | 15,393      | 78.3%   | MF784430              |
|                 | <i>Idiocerus laurifoliae</i>     | 16,811      | 79.5%   | MH433622              |
|                 | <i>Idioscopus nitidulus</i>      | 15,287      | 78.7%   | NC_029203             |

|                |                                       |        |       |           |
|----------------|---------------------------------------|--------|-------|-----------|
|                | <i>Olidiana ritcheiina</i>            | 15,166 | 78%   | MK738125  |
|                | <i>Taharana fasciana</i>              | 15,161 | 77.9% | KY886913  |
|                | <i>Olidiana alata</i>                 | 15,205 | 78%   | MN780581  |
|                | <i>Olidiana longsticka</i>            | 15,993 | 79.7% | MN780582  |
| Coelidiinae    | <i>Olidiana obliqua</i>               | 15,312 | 79.3% | MN780583  |
|                | <i>Olidiana ritcheri</i>              | 15,372 | 78.2% | MN780584  |
|                | <i>Cladolia biungulata</i>            | 15,247 | 78.2% | MW406474  |
|                | <i>Cladolia robusta</i>               | 15,376 | 78.4% | MW406475  |
|                | <i>Olidiana tongmaiensis</i>          | 15,363 | 78.1% | NC_057966 |
|                | <i>Batracomorphus lateprocessus</i>   | 15,356 | 80.5% | MG813489  |
|                | <i>Trocnadella arisana</i>            | 15,131 | 80.7% | NC_036480 |
| Iassinae       | <i>Iassus dorsalis</i>                | 15,176 | 80.1% | MN577634  |
|                | <i>Krisna rufimarginata</i>           | 14,724 | 81.1% | NC_046068 |
|                | <i>Gessius rufidorsus</i>             | 14,634 | 80.7% | MN577633  |
| Macropsinae    | <i>Macropsis notata</i>               | 16,323 | 76.8% | NC_042723 |
|                | <i>Oncopsis nigrofasciata</i>         | 15,927 | 79%   | MG813492  |
|                | <i>Balala fujiana</i>                 | 16,221 | 77.4% | NC_056921 |
|                | <i>Kalasha nativa</i>                 | 15,716 | 74.4% | NC_056922 |
| Hylicinae      | <i>Nacolus tuberculatus</i>           | 15,737 | 77.1% | NC_056923 |
|                | <i>Hylica paradoxa</i>                | 14,762 | 75.8% | NC_056920 |
|                | <i>Drabescus ineffectus</i>           | 15,744 | 77.1% | NC_050258 |
|                | <i>Roxasellana stellata</i>           | 15,361 | 76%   | NC_050257 |
|                | <i>Scaphoideus varius</i>             | 15,207 | 75.9% | KY817245  |
|                | <i>Paramacrosteles nigromaculatus</i> | 15,011 | 76.3% | NC_045270 |
|                | <i>Abrus expansivus</i>               | 15,904 | 74.7% | NC_045238 |
|                | <i>Yanocephalus yanonis</i>           | 15,623 | 74.6% | NC_036131 |
|                | <i>Maieatas dorsalis</i>              | 15,352 | 78.7% | NC_036296 |
|                | <i>Macrosteles quadrilineatus</i>     | 16,626 | 78%   | NC_034781 |
|                | <i>Alobaldia tobae</i>                | 16,026 | 77.8% | KY039116  |
|                | <i>Drabescoides nuchalis</i>          | 15,309 | 75.7% | NC_028154 |
|                | <i>Exitianus indicus</i>              | 16,089 | 75.1% | KY039128  |
|                | <i>Japananus hyalinus</i>             | 15,364 | 76.6% | NC_036298 |
| Deltocephaline | <i>Orosius orientalis</i>             | 15,513 | 72%   | KY039146  |
|                | <i>Scaphoideus nigrivalveus</i>       | 15,235 | 76.5% | KY817244  |
|                | <i>Pellucidus guizhouensis</i>        | 16,555 | 78%   | MF784429  |
|                | <i>Hishimonoides recurvatis</i>       | 14,614 | 76.7% | KY364883  |
|                | <i>Scaphoideus maai</i>               | 15,188 | 77.2% | KY817243  |
|                | <i>Macrosteles quadrimaculatus</i>    | 15,734 | 77.7% | NC_039560 |
|                | <i>Nephotettix cincticeps</i>         | 14,805 | 77.7% | NC_026977 |
|                | <i>Deltocephalinae</i> sp.            | 14,573 | 74.1% | KX437726  |
|                | <i>Cicadula</i> sp.                   | 14,929 | 74.6% | KX437724  |
|                | <i>Norvellina</i> sp.                 | 15,594 | 74.1% | KY039131  |
|                | <i>Tambocerus</i> sp.                 | 15,955 | 76.4% | KT827824  |
|                | <i>Balclutha</i> sp.                  | 14,819 | 75.8% | KX437738  |

---

|          |                            |        |       |           |
|----------|----------------------------|--------|-------|-----------|
| outgroup | <i>Cervaphis quercus</i>   | 15,272 | 84.8% | NC_024926 |
|          | <i>Cacopsylla coccinea</i> | 14,832 | 72.1% | NC_027087 |

---
