# Supplementary material for: Comparative analysis of codon usage patterns and phylogenetic implications of five mitochondrial genomes of the genus Japanagallia Ishihara, 1955 (Hemiptera, Cicadellidae, Megophthalminae)
Source: PeerJ journal article supplement (doi:10.7717/peerj.16058), 2023-09-25
Supplement: Table_S2.pdf [file Table_S2.pdf]

**Table S2.** Collection information of specimen in the present study.

| <b>Name</b>             | <b>Locality</b>                                           | <b>Collector</b>        | <b>Time</b>  |
|-------------------------|-----------------------------------------------------------|-------------------------|--------------|
| <i>J. malaisei</i>      | Pianma, Lushui, Yunnan (N. 26°10', E. 98°38')             | Wang-Jiajia, Zhang-Chao | 26, May 2019 |
| <i>J. curvipenis</i>    | Yunkai Mountain, Xinyi, Guangdong (N. 22°15', E. 111°38') | Xu-Tielong              | 25, Apr 2019 |
| <i>J. multispina</i>    | Baihua Mountain, Baoshan, Yunnan (N. 25°12', E. 99°18')   | Wang-Jiajia, Zhang-Chao | 23, May 2019 |
| <i>J. turriiformis</i>  | Siluo Mountain, Lingshui, Hainan (N. 18°39', E. 109°44')  | Wang-Jiajia             | 18, Aug 2019 |
| <i>Japanagallia</i> sp. | Pianma, Lushui, Yunnan (N. 26°10', E. 98°38')             | Wang-Jiajia, Zhang-Chao | 26, May 2019 |

Note: *J. malaisei* indicates *Japanagallia malaisei*, *J. curvipenis* indicates *Japanagallia curvipenis*, *J. multispina* indicates *Japanagallia multispina*, *J. turriiformis* indicates *Japanagallia turriiformis* and *Japanagallia* sp. indicates *Japanagallia* sp.
