# Supplementary material for: Comparative analysis of codon usage patterns and phylogenetic implications of five mitochondrial genomes of the genus Japanagallia Ishihara, 1955 (Hemiptera, Cicadellidae, Megophthalminae)
Source: PeerJ journal article supplement (doi:10.7717/peerj.16058), 2023-09-25
Supplement: Table_S3.pdf [file Table_S3.pdf]

**Table S3.** Nucleotide composition analysis in the coding sequences of 13 mitochondrial genes from different mitochondrial genome of five *Japanagallia* species.

### ATP6 genes

| CDS.<br>NO. | A<br>% | T<br>% | G<br>% | C<br>% | Total<br>bp | A3<br>% | T3<br>% | G3<br>% | C3<br>% | AT<br>% | GC<br>% | GC1<br>% | GC2<br>% | GC3<br>% | AT3<br>% | GC12<br>% |
|-------------|--------|--------|--------|--------|-------------|---------|---------|---------|---------|---------|---------|----------|----------|----------|----------|-----------|
| 1           | 34.19  | 43.51  | 14.05  | 8.24   | 740.00      | 36.18   | 41.06   | 13.41   | 9.35    | 72.75   | 22.30   | 28.77    | 34.70    | 22.76    | 77.24    | 31.74     |
| 2           | 35.41  | 42.84  | 13.92  | 7.84   | 740.00      | 32.93   | 47.15   | 10.98   | 8.94    | 78.24   | 21.76   | 26.15    | 33.03    | 19.92    | 80.08    | 29.59     |
| 3           | 35.59  | 42.63  | 13.80  | 7.98   | 739.00      | 39.02   | 40.65   | 12.60   | 7.72    | 78.21   | 21.79   | 26.15    | 32.57    | 20.33    | 79.67    | 29.36     |
| 4           | 34.59  | 43.92  | 13.51  | 7.97   | 740.00      | 32.93   | 45.12   | 13.41   | 8.54    | 78.51   | 21.49   | 26.48    | 34.25    | 21.95    | 78.05    | 30.37     |
| 5           | 33.06  | 42.91  | 15.38  | 8.64   | 741.00      | 32.79   | 43.32   | 15.79   | 8.10    | 75.98   | 24.02   | 28.31    | 31.96    | 23.89    | 76.11    | 30.14     |
| <b>Mean</b> | 34.57  | 43.16  | 14.14  | 8.14   |             | 34.77   | 43.46   | 13.24   | 8.53    | 76.74   | 22.27   | 27.17    | 33.30    | 21.77    | 78.23    | 30.24     |
| <b>SD</b>   | 0.91   | 0.48   | 0.65   | 0.28   |             | 2.48    | 2.45    | 1.56    | 0.58    | 2.19    | 0.91    | 1.13     | 1.03     | 1.48     | 1.48     | 0.83      |

### ATP8 genes

| CDS.<br>NO. | A<br>% | T<br>% | G<br>% | C<br>% | Total<br>bp | A3<br>% | T3<br>% | G3<br>% | C3<br>% | AT<br>% | GC<br>% | GC1<br>% | GC2<br>% | GC3<br>% | AT3<br>% | GC12<br>% |
|-------------|--------|--------|--------|--------|-------------|---------|---------|---------|---------|---------|---------|----------|----------|----------|----------|-----------|
| 1           | 46.41  | 35.95  | 5.88   | 11.76  | 153.00      | 49.02   | 39.22   | 3.92    | 7.84    | 82.35   | 17.65   | 15.69    | 25.49    | 11.76    | 88.24    | 20.59     |
| 2           | 49.02  | 33.99  | 4.58   | 12.42  | 153.00      | 56.86   | 33.33   | 0.00    | 9.80    | 83.01   | 16.99   | 15.69    | 25.49    | 9.80     | 90.20    | 20.59     |
| 3           | 49.02  | 33.33  | 3.92   | 13.73  | 153.00      | 58.82   | 33.33   | 0.00    | 7.84    | 82.35   | 17.65   | 11.76    | 33.33    | 7.84     | 92.16    | 22.55     |
| 4           | 50.33  | 35.29  | 3.92   | 10.46  | 153.00      | 58.82   | 33.33   | 0.00    | 7.84    | 85.62   | 14.38   | 9.80     | 25.49    | 7.84     | 92.16    | 17.65     |
| 5           | 46.41  | 35.29  | 5.23   | 13.07  | 153.00      | 52.94   | 33.33   | 0.00    | 13.73   | 81.70   | 18.30   | 15.69    | 25.49    | 13.73    | 86.27    | 20.59     |
| <b>Mean</b> | 48.24  | 34.77  | 4.71   | 12.29  |             | 55.29   | 34.51   | 0.78    | 9.41    | 83.01   | 16.99   | 13.73    | 27.06    | 10.20    | 89.80    | 20.39     |
| <b>SD</b>   | 1.57   | 0.96   | 0.76   | 1.12   |             | 3.80    | 2.35    | 1.57    | 2.29    | 1.37    | 1.37    | 2.48     | 3.14     | 2.29     | 2.29     | 1.57      |

### COX1 genes

| CDS.<br>NO. | A<br>% | T<br>% | G<br>% | C<br>% | Total<br>bp | A3<br>% | T3<br>% | G3<br>% | C3<br>% | AT<br>% | GC<br>% | GC1<br>% | GC2<br>% | GC3<br>% | AT3<br>% | GC12<br>% |
|-------------|--------|--------|--------|--------|-------------|---------|---------|---------|---------|---------|---------|----------|----------|----------|----------|-----------|
| 1           | 31.84  | 36.20  | 14.58  | 17.38  | 1536.00     | 43.75   | 38.28   | 5.27    | 12.70   | 68.03   | 31.97   | 39.06    | 38.87    | 17.97    | 82.03    | 38.96     |
| 2           | 33.66  | 35.49  | 13.70  | 17.16  | 1533.00     | 48.14   | 35.62   | 2.94    | 13.31   | 69.15   | 30.85   | 37.57    | 38.75    | 16.24    | 83.76    | 38.16     |
| 3           | 33.01  | 36.53  | 14.29  | 16.18  | 1533.00     | 45.79   | 37.57   | 5.28    | 11.35   | 69.54   | 30.46   | 36.20    | 38.55    | 16.63    | 83.37    | 37.38     |
| 4           | 33.01  | 36.91  | 14.00  | 16.08  | 1536.00     | 44.92   | 40.82   | 4.69    | 9.57    | 69.92   | 30.08   | 37.30    | 38.67    | 14.26    | 85.74    | 37.99     |
| 5           | 31.97  | 35.81  | 14.84  | 17.38  | 1536.00     | 42.97   | 36.72   | 6.84    | 13.48   | 67.77   | 32.23   | 37.89    | 38.48    | 20.31    | 79.69    | 38.18     |
| <b>Mean</b> | 32.69  | 36.19  | 14.28  | 16.84  |             | 45.11   | 37.80   | 5.00    | 12.08   | 68.88   | 31.12   | 37.61    | 38.66    | 17.08    | 82.92    | 38.13     |
| <b>SD</b>   | 0.69   | 0.51   | 0.41   | 0.58   |             | 1.80    | 1.75    | 1.26    | 1.46    | 0.84    | 0.84    | 0.92     | 0.14     | 2.01     | 2.01     | 0.51      |

## COX2 genes

| CDS. NO.    | A %   | T %   | G %   | C %   | Total bp | A3 %  | T3 %  | G3 % | C3 % | AT %  | GC %  | GC1 % | GC2 % | GC3 % | AT3 % | GC12 % |
|-------------|-------|-------|-------|-------|----------|-------|-------|------|------|-------|-------|-------|-------|-------|-------|--------|
| 1           | 36.82 | 32.84 | 12.37 | 17.97 | 679.00   | 47.35 | 31.42 | 6.64 | 6.64 | 69.66 | 30.34 | 36.12 | 33.63 | 13.27 | 78.76 | 34.88  |
| 2           | 38.88 | 34.32 | 10.46 | 16.35 | 679.00   | 50.44 | 36.28 | 1.77 | 1.77 | 73.20 | 26.80 | 33.48 | 33.63 | 3.54  | 86.73 | 33.55  |
| 3           | 40.21 | 34.02 | 9.87  | 15.91 | 679.00   | 53.10 | 34.07 | 0.88 | 0.88 | 74.23 | 25.77 | 32.16 | 32.30 | 1.77  | 87.17 | 32.23  |
| 4           | 39.32 | 33.43 | 9.72  | 17.53 | 679.00   | 54.87 | 30.97 | 1.33 | 1.33 | 72.75 | 27.25 | 35.68 | 31.86 | 2.65  | 85.84 | 33.77  |
| 5           | 38.00 | 34.76 | 10.75 | 16.49 | 679.00   | 50.00 | 36.28 | 2.65 | 2.65 | 72.75 | 27.25 | 34.80 | 33.19 | 5.31  | 86.28 | 33.99  |
| <b>Mean</b> | 38.65 | 33.87 | 10.63 | 16.85 |          | 51.15 | 33.81 | 2.65 | 2.65 | 72.52 | 27.48 | 34.45 | 32.92 | 5.31  | 84.96 | 33.68  |
| <b>SD</b>   | 1.16  | 0.67  | 0.95  | 0.77  |          | 2.60  | 2.28  | 2.08 | 2.08 | 1.53  | 1.53  | 1.46  | 0.72  | 4.15  | 3.13  | 0.86   |

## COX3 genes

| CDS. NO.    | A %   | T %   | G %   | C %   | Total bp | A3 %  | T3 %  | G3 % | C3 %  | AT %  | GC %  | GC1 % | GC2 % | GC3 % | AT3 % | GC12 % |
|-------------|-------|-------|-------|-------|----------|-------|-------|------|-------|-------|-------|-------|-------|-------|-------|--------|
| 1           | 35.38 | 35.38 | 12.69 | 16.54 | 780.00   | 46.92 | 33.46 | 6.15 | 13.46 | 70.77 | 29.23 | 32.31 | 35.77 | 19.62 | 80.38 | 34.04  |
| 2           | 37.56 | 35.26 | 10.90 | 16.28 | 780.00   | 51.54 | 35.00 | 1.54 | 11.92 | 72.82 | 27.18 | 32.31 | 35.77 | 13.46 | 86.54 | 34.04  |
| 3           | 36.28 | 36.54 | 12.18 | 15.00 | 780.00   | 48.46 | 36.15 | 5.38 | 10.00 | 72.82 | 27.18 | 30.77 | 35.38 | 15.38 | 84.62 | 33.08  |
| 4           | 36.79 | 35.13 | 12.05 | 16.03 | 780.00   | 50.77 | 31.15 | 4.62 | 13.46 | 71.92 | 28.08 | 30.38 | 35.77 | 18.08 | 81.92 | 33.08  |
| 5           | 37.31 | 34.10 | 11.28 | 17.31 | 780.00   | 51.92 | 28.08 | 2.69 | 17.31 | 71.41 | 28.59 | 30.38 | 35.38 | 20.00 | 80.00 | 32.88  |
| <b>Mean</b> | 36.67 | 35.28 | 11.82 | 16.23 |          | 49.92 | 32.77 | 4.08 | 13.23 | 71.95 | 28.05 | 31.23 | 35.62 | 17.31 | 82.69 | 33.42  |
| <b>SD</b>   | 0.78  | 0.78  | 0.65  | 0.75  |          | 1.92  | 2.88  | 1.71 | 2.40  | 0.80  | 0.80  | 0.89  | 0.19  | 2.52  | 2.52  | 0.51   |

## CYTB genes

| CDS. NO.    | A %   | T %   | G %   | C %   | Total bp | A3 %  | T3 %  | G3 % | C3 %  | AT %  | GC %  | GC1 % | GC2 % | GC3 % | AT3 % | GC12 % |
|-------------|-------|-------|-------|-------|----------|-------|-------|------|-------|-------|-------|-------|-------|-------|-------|--------|
| 1           | 35.88 | 36.68 | 11.61 | 15.83 | 1137.00  | 48.55 | 38.26 | 3.17 | 10.03 | 72.56 | 27.44 | 34.04 | 35.09 | 13.19 | 86.81 | 34.56  |
| 2           | 36.07 | 35.15 | 11.29 | 17.49 | 1098.00  | 49.18 | 33.61 | 1.91 | 15.30 | 71.22 | 28.78 | 33.33 | 35.79 | 17.21 | 82.79 | 34.56  |
| 3           | 38.08 | 32.28 | 11.43 | 18.21 | 1137.00  | 53.30 | 26.91 | 3.69 | 16.09 | 70.36 | 29.64 | 34.56 | 34.56 | 19.79 | 80.21 | 34.56  |
| 4           | 37.64 | 35.80 | 10.99 | 15.57 | 1137.00  | 51.45 | 34.56 | 2.64 | 11.35 | 73.44 | 26.56 | 30.87 | 34.83 | 13.98 | 86.02 | 32.85  |
| 5           | 36.68 | 33.07 | 11.79 | 18.47 | 1137.00  | 50.40 | 28.23 | 4.22 | 17.15 | 69.74 | 30.26 | 35.09 | 34.30 | 21.37 | 78.63 | 34.70  |
| <b>Mean</b> | 36.88 | 34.59 | 11.42 | 17.11 |          | 50.58 | 32.31 | 3.13 | 13.97 | 71.46 | 28.54 | 33.58 | 34.92 | 17.11 | 82.89 | 34.25  |
| <b>SD</b>   | 0.86  | 1.66  | 0.27  | 1.20  |          | 1.69  | 4.19  | 0.80 | 2.79  | 1.37  | 1.37  | 1.47  | 0.51  | 3.18  | 3.18  | 0.70   |

## ND1 genes

| CDS. NO.    | A %   | T %   | G %   | C %  | Total bp | A3 %  | T3 %  | G3 %  | C3 % | AT %  | GC %  | GC1 % | GC2 % | GC3 % | AT3 % | GC12 % |
|-------------|-------|-------|-------|------|----------|-------|-------|-------|------|-------|-------|-------|-------|-------|-------|--------|
| 1           | 22.08 | 52.23 | 16.14 | 9.55 | 942.00   | 23.25 | 59.87 | 13.06 | 3.82 | 74.31 | 25.69 | 27.39 | 32.80 | 16.88 | 83.12 | 30.10  |
| 2           | 23.07 | 52.80 | 15.77 | 8.36 | 945.00   | 26.03 | 60.00 | 10.79 | 3.17 | 75.87 | 24.13 | 26.03 | 32.38 | 13.97 | 86.03 | 29.21  |
| 3           | 22.61 | 53.50 | 15.29 | 8.60 | 942.00   | 24.20 | 62.10 | 11.46 | 2.23 | 76.11 | 23.89 | 25.48 | 32.48 | 13.69 | 86.31 | 28.98  |
| 4           | 23.15 | 54.13 | 14.90 | 7.82 | 933.00   | 24.44 | 63.02 | 10.93 | 1.61 | 77.28 | 22.72 | 23.15 | 32.48 | 12.54 | 87.46 | 27.81  |
| 5           | 21.97 | 52.55 | 16.77 | 8.70 | 942.00   | 22.93 | 58.92 | 13.69 | 4.46 | 74.52 | 25.48 | 26.11 | 32.17 | 18.15 | 81.85 | 29.14  |
| <b>Mean</b> | 22.58 | 53.04 | 15.77 | 8.61 |          | 24.17 | 60.78 | 11.99 | 3.06 | 75.62 | 24.38 | 25.63 | 32.46 | 15.05 | 84.95 | 29.05  |
| <b>SD</b>   | 0.49  | 0.69  | 0.65  | 0.56 |          | 1.09  | 1.53  | 1.17  | 1.03 | 1.09  | 1.09  | 1.39  | 0.21  | 2.11  | 2.11  | 0.73   |

## ND2 genes

| CDS. NO.    | A %   | T %   | G %  | C %   | Total bp | A3 %  | T3 %  | G3 % | C3 %  | AT %  | GC %  | GC1 % | GC2 % | GC3 % | AT3 % | GC12 % |
|-------------|-------|-------|------|-------|----------|-------|-------|------|-------|-------|-------|-------|-------|-------|-------|--------|
| 1           | 39.32 | 37.98 | 8.88 | 13.83 | 969.00   | 50.46 | 31.27 | 6.19 | 12.07 | 77.30 | 22.70 | 21.98 | 27.86 | 18.27 | 81.73 | 24.92  |
| 2           | 41.28 | 38.49 | 8.57 | 11.66 | 969.00   | 54.18 | 33.44 | 4.33 | 8.05  | 79.77 | 20.23 | 21.36 | 26.93 | 12.38 | 87.62 | 24.15  |
| 3           | 41.69 | 38.60 | 8.46 | 11.25 | 969.00   | 53.87 | 33.44 | 5.88 | 6.81  | 80.29 | 19.71 | 19.20 | 27.24 | 12.69 | 87.31 | 23.22  |
| 4           | 41.59 | 39.42 | 8.05 | 10.94 | 969.00   | 54.80 | 35.91 | 3.72 | 5.57  | 81.01 | 18.99 | 18.89 | 28.79 | 9.29  | 90.71 | 23.84  |
| 5           | 39.22 | 38.39 | 9.70 | 12.69 | 969.00   | 51.08 | 32.51 | 6.50 | 9.91  | 77.61 | 22.39 | 21.98 | 28.79 | 16.41 | 83.59 | 25.39  |
| <b>Mean</b> | 40.62 | 38.58 | 8.73 | 12.07 |          | 52.88 | 33.31 | 5.33 | 8.48  | 79.20 | 20.80 | 20.68 | 27.93 | 13.81 | 86.19 | 24.30  |
| <b>SD</b>   | 1.11  | 0.47  | 0.55 | 1.06  |          | 1.76  | 1.52  | 1.10 | 2.30  | 1.48  | 1.48  | 1.36  | 0.77  | 3.17  | 3.17  | 0.77   |

## ND3 genes

| CDS. NO.    | A %   | T %   | G %  | C %   | Total bp | A3 %  | T3 %  | G3 % | C3 %  | AT %  | GC %  | GC1 % | GC2 % | GC3 % | AT3 % | GC12 % |
|-------------|-------|-------|------|-------|----------|-------|-------|------|-------|-------|-------|-------|-------|-------|-------|--------|
| 1           | 37.57 | 37.57 | 9.32 | 15.54 | 354.00   | 46.61 | 28.81 | 6.78 | 17.80 | 75.14 | 24.86 | 24.58 | 25.42 | 24.58 | 75.42 | 25.00  |
| 2           | 38.94 | 39.78 | 8.12 | 13.17 | 357.00   | 51.26 | 35.29 | 1.68 | 11.76 | 78.71 | 21.29 | 24.37 | 26.05 | 13.45 | 86.55 | 25.21  |
| 3           | 42.94 | 38.14 | 7.34 | 11.58 | 354.00   | 58.47 | 31.36 | 2.54 | 7.63  | 81.07 | 18.93 | 21.19 | 25.42 | 10.17 | 89.83 | 23.31  |
| 4           | 39.27 | 39.83 | 7.91 | 12.99 | 354.00   | 50.00 | 38.14 | 3.39 | 8.47  | 79.10 | 20.90 | 24.58 | 26.27 | 11.86 | 88.14 | 25.42  |
| 5           | 37.01 | 38.98 | 8.47 | 15.54 | 354.00   | 48.31 | 28.81 | 5.08 | 17.80 | 75.99 | 24.01 | 26.27 | 22.88 | 22.88 | 77.12 | 24.58  |
| <b>Mean</b> | 39.14 | 38.86 | 8.23 | 13.76 |          | 50.93 | 32.49 | 3.89 | 12.69 | 78.00 | 22.00 | 24.20 | 25.21 | 16.59 | 83.41 | 24.70  |
| <b>SD</b>   | 2.07  | 0.89  | 0.66 | 1.55  |          | 4.09  | 3.69  | 1.83 | 4.39  | 2.16  | 2.16  | 1.65  | 1.21  | 5.95  | 5.95  | 0.75   |

## ND4 genes

| CDS. NO.    | A %   | T %   | G %   | C %  | Total bp | A3 %  | T3 %  | G3 %  | C3 % | AT %  | GC %  | GC1 % | GC2 % | GC3 % | AT3 % | GC12 % |
|-------------|-------|-------|-------|------|----------|-------|-------|-------|------|-------|-------|-------|-------|-------|-------|--------|
| 1           | 23.54 | 54.14 | 13.59 | 8.73 | 1317.00  | 23.69 | 61.05 | 9.79  | 5.47 | 77.68 | 22.32 | 23.01 | 28.70 | 15.26 | 84.74 | 25.85  |
| 2           | 23.32 | 54.97 | 13.53 | 8.18 | 1308.00  | 23.39 | 63.30 | 9.40  | 3.90 | 78.29 | 21.71 | 23.39 | 28.44 | 13.30 | 86.70 | 25.92  |
| 3           | 23.24 | 55.66 | 13.30 | 7.80 | 1308.00  | 24.77 | 63.30 | 8.72  | 3.21 | 78.90 | 21.10 | 21.33 | 30.05 | 11.93 | 88.07 | 25.69  |
| 4           | 24.45 | 54.52 | 13.06 | 7.97 | 1317.00  | 27.33 | 61.96 | 7.52  | 3.19 | 78.97 | 21.03 | 22.55 | 29.84 | 10.71 | 89.29 | 26.20  |
| 5           | 23.16 | 54.21 | 14.20 | 8.43 | 1317.00  | 23.46 | 61.50 | 11.16 | 3.87 | 77.37 | 22.63 | 24.15 | 28.70 | 15.03 | 84.97 | 26.42  |
| <b>Mean</b> | 23.54 | 54.70 | 13.54 | 8.22 |          | 24.53 | 62.22 | 9.32  | 3.93 | 78.24 | 21.76 | 22.89 | 29.15 | 13.25 | 86.75 | 26.02  |
| <b>SD</b>   | 0.47  | 0.56  | 0.38  | 0.33 |          | 1.49  | 0.93  | 1.20  | 0.83 | 0.64  | 0.64  | 0.94  | 0.66  | 1.76  | 1.76  | 0.26   |

## ND4L genes

| CDS. NO.    | A %   | T %   | G %   | C %  | Total bp | A3 %  | T3 %  | G3 %  | C3 % | AT %  | GC %  | GC1 % | GC2 % | GC3 % | AT3 % | GC12 % |
|-------------|-------|-------|-------|------|----------|-------|-------|-------|------|-------|-------|-------|-------|-------|-------|--------|
| 1           | 23.19 | 55.07 | 16.30 | 5.43 | 276.00   | 25.00 | 58.70 | 15.22 | 1.09 | 78.26 | 21.74 | 27.17 | 21.74 | 16.30 | 83.70 | 24.46  |
| 2           | 26.09 | 55.43 | 11.96 | 6.52 | 276.00   | 32.61 | 60.87 | 4.35  | 2.17 | 81.52 | 18.48 | 27.17 | 21.74 | 6.52  | 93.48 | 24.46  |
| 3           | 23.61 | 56.25 | 13.89 | 6.25 | 288.00   | 26.04 | 61.46 | 11.46 | 1.04 | 79.86 | 20.14 | 26.04 | 21.88 | 12.50 | 87.50 | 23.96  |
| 4           | 25.72 | 55.07 | 13.41 | 5.80 | 276.00   | 29.35 | 59.78 | 9.78  | 1.09 | 80.80 | 19.20 | 25.00 | 21.74 | 10.87 | 89.13 | 23.37  |
| 5           | 22.46 | 54.71 | 14.86 | 7.97 | 276.00   | 20.65 | 60.87 | 13.04 | 5.43 | 77.17 | 22.83 | 28.26 | 21.74 | 18.48 | 81.52 | 25.00  |
| <b>Mean</b> | 24.21 | 55.32 | 14.08 | 6.39 |          | 26.72 | 60.34 | 10.78 | 2.16 | 79.52 | 20.48 | 26.73 | 21.77 | 12.93 | 87.07 | 24.25  |
| <b>SD</b>   | 1.43  | 0.52  | 1.45  | 0.87 |          | 4.05  | 0.98  | 3.68  | 1.69 | 1.60  | 1.60  | 1.11  | 0.05  | 4.19  | 4.19  | 0.55   |

## ND5 genes

| CDS. NO.    | A %   | T %   | G %   | C %  | Total bp | A3 %  | T3 %  | G3 % | C3 % | AT %  | GC %  | GC1 % | GC2 % | GC3 % | AT3 % | GC12 % |
|-------------|-------|-------|-------|------|----------|-------|-------|------|------|-------|-------|-------|-------|-------|-------|--------|
| 1           | 25.21 | 52.99 | 13.50 | 8.30 | 1674.00  | 26.34 | 60.22 | 9.14 | 4.30 | 78.20 | 21.80 | 22.04 | 29.93 | 13.44 | 86.56 | 25.99  |
| 2           | 25.45 | 52.63 | 13.80 | 8.12 | 1674.00  | 25.81 | 60.04 | 9.86 | 4.30 | 78.08 | 21.92 | 22.04 | 29.57 | 14.16 | 85.84 | 25.81  |
| 3           | 24.79 | 53.41 | 13.56 | 8.24 | 1674.00  | 25.45 | 61.11 | 8.78 | 4.66 | 78.20 | 21.80 | 21.51 | 30.47 | 13.44 | 86.56 | 25.99  |
| 4           | 26.11 | 53.58 | 12.60 | 7.71 | 1674.00  | 28.49 | 62.01 | 6.63 | 2.87 | 79.69 | 20.31 | 22.58 | 28.85 | 9.50  | 90.50 | 25.72  |
| 5           | 25.09 | 53.17 | 13.26 | 8.48 | 1674.00  | 25.45 | 62.01 | 8.42 | 4.12 | 78.26 | 21.74 | 22.76 | 29.93 | 12.54 | 87.46 | 26.34  |
| <b>Mean</b> | 25.33 | 53.15 | 13.35 | 8.17 |          | 26.31 | 61.08 | 8.57 | 4.05 | 78.48 | 21.52 | 22.19 | 29.75 | 12.62 | 87.38 | 25.97  |
| <b>SD</b>   | 0.44  | 0.33  | 0.41  | 0.26 |          | 1.14  | 0.84  | 1.08 | 0.62 | 0.61  | 0.61  | 0.44  | 0.53  | 1.64  | 1.64  | 0.22   |

## ND6 genes

| <b>CDS. NO.</b> | <b>A %</b> | <b>T %</b> | <b>G %</b> | <b>C %</b> | <b>Total bp</b> | <b>A3 %</b> | <b>T3 %</b> | <b>G3 %</b> | <b>C3 %</b> | <b>AT %</b> | <b>GC %</b> | <b>GC1 %</b> | <b>GC2 %</b> | <b>GC3 %</b> | <b>AT3 %</b> | <b>GC12 %</b> |
|-----------------|------------|------------|------------|------------|-----------------|-------------|-------------|-------------|-------------|-------------|-------------|--------------|--------------|--------------|--------------|---------------|
| 1               | 46.30      | 35.60      | 7.41       | 10.70      | 486.00          | 59.88       | 30.25       | 2.47        | 7.41        | 81.89       | 18.11       | 21.60        | 22.84        | 9.88         | 90.12        | 22.22         |
| 2               | 46.51      | 32.95      | 7.36       | 13.18      | 516.00          | 57.56       | 27.91       | 4.65        | 9.88        | 79.46       | 20.54       | 23.26        | 23.84        | 14.53        | 85.47        | 23.55         |
| 3               | 47.33      | 34.98      | 6.79       | 10.91      | 486.00          | 62.96       | 29.01       | 1.85        | 6.17        | 82.30       | 17.70       | 22.22        | 22.84        | 8.02         | 91.98        | 22.53         |
| 4               | 47.53      | 33.95      | 8.02       | 10.49      | 486.00          | 63.58       | 27.16       | 4.32        | 4.94        | 81.48       | 18.52       | 22.84        | 23.46        | 9.26         | 90.74        | 23.15         |
| 5               | 46.91      | 32.30      | 8.64       | 12.14      | 486.00          | 62.35       | 24.07       | 3.70        | 9.88        | 79.22       | 20.78       | 27.16        | 21.60        | 13.58        | 86.42        | 24.38         |
| <b>Mean</b>     | 46.91      | 33.94      | 7.64       | 11.50      |                 | 61.22       | 27.68       | 3.41        | 7.68        | 80.87       | 19.13       | 23.42        | 22.92        | 11.06        | 88.94        | 23.17         |
| <b>SD</b>       | 0.47       | 1.22       | 0.63       | 1.02       |                 | 2.24        | 2.08        | 1.07        | 1.98        | 1.28        | 1.28        | 1.95         | 0.76         | 2.54         | 2.54         | 0.76          |
