# Supplementary material for: Comparative analysis of codon usage patterns and phylogenetic implications of five mitochondrial genomes of the genus Japanagallia Ishihara, 1955 (Hemiptera, Cicadellidae, Megophthalminae)
Source: PeerJ journal article supplement (doi:10.7717/peerj.16058), 2023-09-25
Supplement: Table_S4.pdf [file Table_S4.pdf]

**Table S4.** Overall relative synonymous codon usage (RSCU) values in the coding sequences of 13 mitochondrial genes from different mitochondrial genome of five *Japanagallia* species.

| ATP6       |       |      |                   |            |       |      |                   |      |      |
|------------|-------|------|-------------------|------------|-------|------|-------------------|------|------|
| Amino Acid | Codon | N    | RSCU <sup>a</sup> | Amino Acid | Codon | N    | RSCU <sup>a</sup> |      |      |
| Ala        | A     | GCU* | 4.8               | 2.46       |       | UUC  | 4.6               | 0.78 |      |
|            |       | GCC  | 0.8               | 0.41       | Leu   | L    | UUA*              | 18.4 | 3.37 |
|            |       | GCA* | 2                 | 1.03       |       |      | UUG               | 1.2  | 0.22 |
|            |       | GCG  | 0.2               | 0.1        |       |      | CUU               | 5    | 0.91 |
| Arg        | R     | CGU* | 0.6               | 1.2        |       | CUC  | 0.4               | 0.07 |      |
|            |       | CGC  | 0                 | 0          |       | CUA* | 7.6               | 1.39 |      |
|            |       | CGA* | 1.4               | 2.8        | Pro   | P    | CCU*              | 4.8  | 2.09 |
|            |       | CGG  | 0                 | 0          |       |      | CCC               | 0.2  | 0.09 |
| Asn        | N     | AAU* | 9.6               | 1.26       |       | CCA* | 4.2               | 1.83 |      |
|            |       | AAC  | 5.6               | 0.74       |       | CCG  | 0                 | 0    |      |
| Asp        | D     | GAU  | 0.4               | 0.8        | Ser   | S    | UCU*              | 3.4  | 1.36 |
|            |       | GAC* | 0.6               | 1.2        |       |      | UCC               | 0.8  | 0.32 |
| Cys        | C     | UGU  | 0.6               | 0.55       |       | UCA* | 6.8               | 2.72 |      |
|            |       | UGC* | 1.6               | 1.45       |       | UCG  | 1                 | 0.4  |      |
| Gln        | Q     | CAA* | 2                 | 2          |       | AGU  | 0.6               | 0.24 |      |
|            |       | CAG  | 0                 | 0          |       | AGC  | 0.2               | 0.08 |      |
| Clu        | E     | GAA* | 4                 | 2          |       | AGA* | 7.2               | 2.88 |      |
|            |       | GAG  | 0                 | 0          |       | AGG  | 0                 | 0    |      |
| Gly        | G     | GGU  | 1.6               | 0.71       | Thr   | T    | ACU*              | 5.6  | 1.2  |
|            |       | GGC  | 0.6               | 0.27       |       |      | ACC               | 1.8  | 0.39 |
|            |       | GGA* | 4.8               | 2.13       |       |      | ACA*              | 11.2 | 2.41 |
|            |       | GGG  | 2                 | 0.89       |       |      | ACG               | 0    | 0    |
| His        | H     | CAU* | 1.6               | 1.07       | Tyr   | Y    | UAU*              | 3.8  | 1.23 |
|            |       | CAC  | 1.4               | 0.93       |       |      | UAC               | 2.4  | 0.77 |
| Ile        | I     | AUU* | 17.2              | 1.58       | Val   | V    | GUU*              | 2.4  | 1.17 |
|            |       | AUC  | 4.6               | 0.42       |       |      | GUC               | 0    | 0    |
| Lys        | K     | AAA* | 7.8               | 1.81       |       | GUA* | 5.6               | 2.73 |      |
|            |       | AAG  | 0.8               | 0.19       |       | GUG  | 0.2               | 0.1  |      |
| Met        | M     | AUA* | 27.4              | 1.81       | Trp   | W    | UGA*              | 3.6  | 1.8  |
|            |       | AUG  | 2.8               | 0.19       |       |      | UGG               | 0.4  | 0.2  |
| Phe        | F     | UUU* | 7.2               | 1.22       |       |      |                   |      |      |

**ATP8**

| <b>Amino Acid</b> | <b>Codon</b> | <b>N</b> | <b>RSCU<sup>a</sup></b> | <b>Amino Acid</b> | <b>Codon</b> | <b>N</b> | <b>RSCU<sup>a</sup></b> |      |      |
|-------------------|--------------|----------|-------------------------|-------------------|--------------|----------|-------------------------|------|------|
| Ala               | A            | GCU      | 0.2                     | 0.8               |              | UUC      | 0                       | 0    |      |
|                   |              | GCC      | 0                       | 0                 | Leu          | L        | UUA*                    | 3.2  | 3.56 |
|                   |              | GCA*     | 0.8                     | 3.2               |              |          | UUG                     | 0.2  | 0.22 |
| Arg               | R            | GCG      | 0                       | 0                 |              | CUU*     | 1                       | 1.11 |      |
|                   |              | CGU      | 0                       | 0                 |              | CUC      | 0.2                     | 0.22 |      |
|                   |              | CGC      | 0                       | 0                 |              | CUA      | 0.8                     | 0.89 |      |
|                   |              | CGA      | 0                       | 0                 | Pro          | P        | CCU*                    | 1.4  | 2.55 |
| CGG               | 0            | 0        |                         | CCC               |              | 0.2      | 0.36                    |      |      |
| Asn               | N            | AAU*     | 4.2                     | 1.4               |              | CCA*     | 0.6                     | 1.09 |      |
|                   |              | AAC      | 1.8                     | 0.6               |              | CCG      | 0                       | 0    |      |
| Asp               | D            | GAU*     | 0.2                     | 2                 | Ser          | S        | UCU                     | 0    | 0    |
|                   |              | GAC      | 0                       | 0                 |              |          | UCC                     | 0.2  | 0.57 |
| Cys               | C            | UGU      | 0                       | 0                 |              | UCA*     | 1.4                     | 4    |      |
|                   |              | UGC      | 0                       | 0                 |              | UCG      | 0                       | 0    |      |
| Gln               | Q            | CAA*     | 1                       | 2                 |              | AGU      | 0                       | 0    |      |
|                   |              | CAG      | 0                       | 0                 |              | AGC      | 0.2                     | 0.57 |      |
| Clu               | E            | GAA      | 0                       | 0                 |              | AGA*     | 1                       | 2.86 |      |
|                   |              | GAG      | 0                       | 0                 |              | AGG      | 0                       | 0    |      |
| Gly               | G            | GGU      | 0                       | 0                 | Thr          | T        | ACU*                    | 2    | 2.11 |
|                   |              | GGC      | 0                       | 0                 |              |          |                         | ACC  | 0.2  |
|                   |              | GGA      | 0                       | 0                 |              | ACA*     | 1.6                     | 1.68 |      |
|                   |              | GGG      | 0                       | 0                 |              | ACG      | 0                       | 0    |      |
| His               | H            | CAU      | 0                       | 0                 | Tyr          | Y        | UAU                     | 0.8  | 0.73 |
|                   |              | CAC*     | 0.2                     | 2                 |              |          |                         | UAC* | 1.4  |
| Ile               | I            | AUU*     | 5                       | 1.85              | Val          | V        | GUU                     | 0    | 0    |
|                   |              | AUC      | 0.4                     | 0.15              |              |          |                         | GUC  | 0    |
| Lys               | K            | AAA*     | 5.8                     | 1.93              |              | GUA*     | 0.4                     | 4    |      |
|                   |              | AAG      | 0.2                     | 0.07              |              | GUG      | 0                       | 0    |      |
| Met               | M            | AUA*     | 6.6                     | 2                 | Trp          | W        | UGA*                    | 4    | 2    |
|                   |              | AUG      | 0                       | 0                 |              |          |                         | UGG  | 0    |
| Phe               | F            | UUU*     | 2.8                     | 2                 |              |          |                         |      |      |

**COX1**

| <b>Amino Acid</b> | <b>Codon</b> | <b>N</b>    | <b>RSCU<sup>a</sup></b> | <b>Amino Acid</b> | <b>Codon</b> | <b>N</b>    | <b>RSCU<sup>a</sup></b> |      |      |
|-------------------|--------------|-------------|-------------------------|-------------------|--------------|-------------|-------------------------|------|------|
| Ala               | A            | <b>GCU*</b> | 11.2                    | 1.93              |              | UUC         | 11.6                    | 0.59 |      |
|                   |              | GCC         | 1                       | 0.17              | Leu          | L           | <b>UUA*</b>             | 29.8 | 3.52 |
|                   |              | <b>GCA*</b> | 10.2                    | 1.76              |              | UUG         | 2.6                     | 0.31 |      |
|                   | GCG          | 0.8         | 0.14                    | CUU               |              | 7           | 0.83                    |      |      |
| Arg               | R            | CGU         | 1.4                     | 0.7               |              | CUC         | 1                       | 0.12 |      |
|                   |              | CGC         | 0                       | 0                 |              | CUA*        | 9.4                     | 1.11 |      |
|                   |              | <b>CGA*</b> | 6.6                     | 3.3               | Pro          | P           | <b>CCU*</b>             | 10.2 | 1.63 |
| Asn               | N            | AAU*        | 15                      | 1.46              |              |             | CCC                     | 2    | 0.32 |
|                   |              | AAC         | 5.6                     | 0.54              |              |             | <b>CCA*</b>             | 12.4 | 1.98 |
| Asp               | D            | GAU*        | 9.8                     | 1.4               |              | CCG         | 0.4                     | 0.06 |      |
|                   |              | GAC         | 4.2                     | 0.6               | Ser          | S           | <b>UCU*</b>             | 13.4 | 2.11 |
| Cys               | C            | <b>UGU*</b> | 0.2                     | 2                 |              |             | UCC                     | 4.8  | 0.76 |
|                   |              | UGC         | 0                       | 0                 |              | <b>UCA*</b> | 19.8                    | 3.12 |      |
| Gln               | Q            | <b>CAA*</b> | 7.2                     | 1.8               |              | UCG         | 1.4                     | 0.22 |      |
|                   |              | CAG         | 0.8                     | 0.2               |              | AGU         | 0.8                     | 0.13 |      |
| Clu               | E            | <b>GAA*</b> | 8.2                     | 1.82              |              | AGC         | 0.8                     | 0.13 |      |
|                   |              | GAG         | 0.8                     | 0.18              |              | AGA*        | 8.6                     | 1.35 |      |
| Gly               | G            | GGU*        | 10.8                    | 1.03              |              | AGG         | 1.2                     | 0.19 |      |
|                   |              | GGC         | 0.6                     | 0.06              | Thr          | T           | <b>ACU*</b>             | 15   | 1.79 |
|                   |              | <b>GGA*</b> | 23.8                    | 2.27              |              |             | ACC                     | 4.4  | 0.52 |
|                   | GGG          | 6.8         | 0.65                    |                   |              | ACA*        | 13.4                    | 1.6  |      |
| His               | H            | CAU*        | 10.8                    | 1.35              |              | ACG         | 0.8                     | 0.1  |      |
|                   |              | CAC         | 5.2                     | 0.65              | Tyr          | Y           | UAU*                    | 10.2 | 1.15 |
| Ile               | I            | AUU*        | 42.4                    | 1.56              |              |             | UAC                     | 7.6  | 0.85 |
|                   |              | AUC         | 12                      | 0.44              | Val          | V           | GUU*                    | 7.8  | 1.08 |
| Lys               | K            | <b>AAA*</b> | 9                       | 1.76              |              |             | GUC                     | 1    | 0.14 |
|                   |              | AAG         | 1.2                     | 0.24              |              | <b>GUA*</b> | 18.6                    | 2.58 |      |
| Met               | M            | <b>AUA*</b> | 40.2                    | 1.82              |              | GUG         | 1.4                     | 0.19 |      |
|                   |              | AUG         | 4                       | 0.18              | Trp          | W           | <b>UGA*</b>             | 12.8 | 1.71 |
| Phe               | F            | UUU*        | 27.4                    | 1.41              |              |             | UGG                     | 2.2  | 0.29 |

**COX2**

| <b>Amino Acid</b> | <b>Codon</b> | <b>N</b> | <b>RSCU<sup>a</sup></b> | <b>Amino Acid</b> | <b>Codon</b> | <b>N</b> | <b>RSCU<sup>a</sup></b> |      |      |
|-------------------|--------------|----------|-------------------------|-------------------|--------------|----------|-------------------------|------|------|
| Ala               | A            | GCU*     | 1.4                     | 1.22              |              | UUC      | 3.8                     | 0.55 |      |
|                   |              | GCC      | 0.6                     | 0.52              | Leu          | L        | UUA*                    | 14.8 | 4.11 |
|                   |              | GCA*     | 2.2                     | 1.91              |              |          | UUG                     | 0.2  | 0.06 |
| Arg               | R            | GCG      | 0.4                     | 0.35              |              | CUU      | 1.4                     | 0.39 |      |
|                   |              | CGU*     | 1.8                     | 1.03              |              | CUC      | 0.2                     | 0.06 |      |
|                   |              | CGC      | 0.2                     | 0.11              | Pro          | P        | CUA*                    | 4.8  | 1.33 |
|                   |              | CGA*     | 4.8                     | 2.74              |              |          | CUG                     | 0.2  | 0.06 |
| Asn               | N            | CGG      | 0.2                     | 0.11              |              | CCU*     | 3.6                     | 1.26 |      |
|                   |              | AAU*     | 6.2                     | 1.02              |              | CCC      | 1                       | 0.35 |      |
| Asp               | D            | AAC      | 6                       | 0.98              |              | CCA*     | 6.4                     | 2.25 |      |
|                   |              | GAU*     | 5                       | 1.25              | Ser          | S        | CCG                     | 0.4  | 0.14 |
| Cys               | C            | GAC      | 3                       | 0.75              |              |          | UCU*                    | 4.8  | 1.78 |
|                   |              | UGU      | 0.8                     | 0.8               |              | UCC      | 1.6                     | 0.59 |      |
| Gln               | Q            | UGC*     | 1.2                     | 1.2               |              | UCA*     | 10.8                    | 4    |      |
|                   |              | CAA*     | 7.6                     | 1.9               |              | UCG      | 0.8                     | 0.3  |      |
| Clu               | E            | CAG      | 0.4                     | 0.1               |              | AGU      | 0.6                     | 0.22 |      |
|                   |              | GAA*     | 10.2                    | 1.85              |              | AGC      | 0.2                     | 0.07 |      |
|                   |              | GAG      | 0.8                     | 0.15              |              | AGA*     | 2.8                     | 1.04 |      |
| Gly               | G            | GGU      | 1.2                     | 0.6               | Thr          | T        | AGG                     | 0    | 0    |
|                   |              | GGC      | 0                       | 0                 |              |          | ACU*                    | 4.4  | 1.26 |
|                   |              | GGA*     | 6                       | 3                 |              |          | ACC                     | 1.2  | 0.34 |
| His               | H            | GGG      | 0.8                     | 0.4               |              | ACA*     | 8.2                     | 2.34 |      |
|                   |              | CAU*     | 4.4                     | 1.63              |              | ACG      | 0.2                     | 0.06 |      |
|                   |              | CAC      | 1                       | 0.37              | Tyr          | Y        | UAU*                    | 5.2  | 1.49 |
| AUU*              | 22.4         | 1.6      |                         | UAC               |              | 1.8      | 0.51                    |      |      |
| Ile               | I            | AUC      | 5.6                     | 0.4               | Val          | V        | GUU*                    | 3.2  | 1.56 |
|                   |              | AAA*     | 8.8                     | 1.96              |              |          | GUC                     | 0.6  | 0.29 |
| Lys               | K            | AAG      | 0.2                     | 0.04              |              | GUA*     | 3.8                     | 1.85 |      |
|                   |              | AUA*     | 18.6                    | 1.92              |              | GUG      | 0.6                     | 0.29 |      |
| Met               | M            | AUG      | 0.8                     | 0.08              | Trp          | W        | UGA*                    | 5.8  | 2    |
|                   |              | UUU*     | 10                      | 1.45              |              |          | UGG                     | 0    | 0    |

**COX3**

| <b>Amino Acid</b> | <b>Codon</b> | <b>N</b> | <b>RSCU<sup>a</sup></b> | <b>Amino Acid</b> | <b>Codon</b> | <b>N</b> | <b>RSCU<sup>a</sup></b> |      |      |
|-------------------|--------------|----------|-------------------------|-------------------|--------------|----------|-------------------------|------|------|
| Ala               | A            | GCU*     | 1.2                     | 1.09              |              | UUC      | 9                       | 0.83 |      |
|                   |              | GCC      | 0.4                     | 0.36              | Leu          | L        | UUA*                    | 12.6 | 3.32 |
|                   |              | GCA*     | 2.8                     | 2.55              |              |          | UUG                     | 0.8  | 0.21 |
|                   | GCG          | 0        | 0                       |                   |              | CUU      | 3.6                     | 0.95 |      |
| Arg               | R            | CGU*     | 0.8                     | 1.07              |              | CUC      | 0.4                     | 0.11 |      |
|                   |              | CGC      | 0                       | 0                 |              | CUA*     | 4.6                     | 1.21 |      |
|                   |              | CGA*     | 2.2                     | 2.93              | Pro          | P        | CCU*                    | 2.8  | 1.24 |
| Asn               | N            | AAU*     | 8.6                     | 1.3               |              |          | CCC                     | 0.6  | 0.27 |
|                   |              | AAC      | 4.6                     | 0.7               |              |          | CCA*                    | 5.6  | 2.49 |
| Asp               | D            | GAU*     | 3                       | 1.43              |              | CCG      | 0                       | 0    |      |
|                   |              | GAC      | 1.2                     | 0.57              | Ser          | S        | UCU*                    | 5.2  | 1.33 |
| Cys               | C            | UGU      | 0                       | 0                 |              |          | UCC                     | 1.6  | 0.41 |
|                   |              | UGC      | 0                       | 0                 |              | UCA*     | 15.8                    | 4.05 |      |
| Gln               | Q            | CAA*     | 4.6                     | 1.84              |              | UCG      | 1                       | 0.26 |      |
|                   |              | CAG      | 0.4                     | 0.16              |              | AGU      | 0.6                     | 0.15 |      |
| Glu               | E            | GAA*     | 6                       | 1.76              |              | AGC      | 0.4                     | 0.1  |      |
|                   |              | GAG      | 0.8                     | 0.24              |              | AGA*     | 6                       | 1.54 |      |
| Gly               | G            | GGU*     | 4.2                     | 1.04              |              | AGG      | 0.6                     | 0.15 |      |
|                   |              | GGC      | 0.6                     | 0.15              | Thr          | T        | ACU*                    | 5.2  | 1.24 |
|                   |              | GGA*     | 9.8                     | 2.42              |              |          | ACC                     | 1.4  | 0.33 |
|                   | GGG          | 1.6      | 0.4                     |                   |              | ACA*     | 9.8                     | 2.33 |      |
| His               | H            | CAU*     | 7.2                     | 1.2               |              | ACG      | 0.4                     | 0.1  |      |
|                   |              | CAC      | 4.8                     | 0.8               | Tyr          | Y        | UAU*                    | 5.6  | 1.3  |
| Ile               | I            | AUU*     | 21.4                    | 1.55              |              |          | UAC                     | 3    | 0.7  |
|                   |              | AUC      | 6.2                     | 0.45              | Val          | V        | GUU*                    | 3.2  | 1.14 |
| Lys               | K            | AAA*     | 6.4                     | 1.88              |              |          | GUC                     | 0.2  | 0.07 |
|                   |              | AAG      | 0.4                     | 0.12              |              | GUA*     | 7.4                     | 2.64 |      |
| Met               | M            | AUA*     | 24.2                    | 1.82              |              | GUG      | 0.4                     | 0.14 |      |
|                   |              | AUG      | 2.4                     | 0.18              | Trp          | W        | UGA*                    | 11   | 1.83 |
| Phe               | F            | UUU*     | 12.6                    | 1.17              |              |          | UGG                     | 1    | 0.17 |

**CYTB**

| <b>Amino Acid</b> | <b>Codon</b> | <b>N</b> | <b>RSCU<sup>a</sup></b> | <b>Amino Acid</b> | <b>Codon</b> | <b>N</b> | <b>RSCU<sup>a</sup></b> |      |      |
|-------------------|--------------|----------|-------------------------|-------------------|--------------|----------|-------------------------|------|------|
| Ala               | A            | GCU*     | 5                       | 1.19              |              | UUC      | 9.6                     | 0.77 |      |
|                   |              | GCC      | 1.4                     | 0.33              | Leu          | L        | UUA*                    | 27.6 | 3.55 |
|                   |              | GCA*     | 9.8                     | 2.33              |              |          | UUG                     | 1.4  | 0.18 |
| Arg               | R            | GCG      | 0.6                     | 0.14              |              | CUU      | 4                       | 0.52 |      |
|                   |              | CGU      | 0.8                     | 0.47              |              | CUC      | 0.8                     | 0.1  |      |
|                   |              | CGC      | 0.2                     | 0.12              |              | CUA*     | 12.6                    | 1.62 |      |
|                   |              | CGA*     | 4.8                     | 2.82              | Pro          | P        | CCU*                    | 6.8  | 1.36 |
| Asn               | N            | AAU*     | 12.8                    | 1.14              |              |          | CCC                     | 1.2  | 0.24 |
| Asp               | D            | AAC      | 9.6                     | 0.86              |              | CCA*     | 11.6                    | 2.32 |      |
|                   |              | GAU*     | 6.4                     | 1.33              |              | CCG      | 0.4                     | 0.08 |      |
| Cys               | C            | GAC      | 3.2                     | 0.67              | Ser          | S        | UCU*                    | 6.4  | 1.78 |
|                   |              | UGU*     | 1                       | 1                 |              |          | UCC                     | 2.2  | 0.61 |
| Gln               | Q            | UGC*     | 1                       | 1                 |              | UCA*     | 14.2                    | 3.94 |      |
|                   |              | CAA*     | 4.8                     | 2                 |              | UCG      | 0.4                     | 0.11 |      |
| Clu               | E            | CAG      | 0                       | 0                 |              | AGU      | 0.2                     | 0.06 |      |
|                   |              | GAA*     | 6                       | 2                 |              | AGC      | 0.2                     | 0.06 |      |
| Gly               | G            | GAG      | 0                       | 0                 |              | AGA*     | 4.6                     | 1.28 |      |
|                   |              | GGU      | 3.2                     | 0.56              |              | AGG      | 0.6                     | 0.17 |      |
|                   |              | GGC      | 0.4                     | 0.07              | Thr          | T        | ACU*                    | 7.8  | 1.39 |
|                   |              | GGA*     | 16                      | 2.81              |              |          | ACC                     | 2.2  | 0.39 |
| His               | H            | GGG      | 3.2                     | 0.56              |              | ACA*     | 11.8                    | 2.11 |      |
|                   |              | CAU*     | 4.8                     | 1.07              |              | ACG      | 0.6                     | 0.11 |      |
| Ile               | I            | CAC      | 4.2                     | 0.93              | Tyr          | Y        | UAU*                    | 10   | 1.16 |
|                   |              | AUU*     | 33.4                    | 1.58              |              |          | UAC                     | 7.2  | 0.84 |
| Lys               | K            | AUC      | 9                       | 0.42              | Val          | V        | GUU*                    | 3.8  | 1.17 |
|                   |              | AAA*     | 14.2                    | 1.89              |              |          | GUC                     | 0.2  | 0.06 |
| Met               | M            | AAG      | 0.8                     | 0.11              |              | GUA*     | 8.8                     | 2.71 |      |
|                   |              | AUA*     | 32                      | 1.93              |              | GUG      | 0.2                     | 0.06 |      |
| Phe               | F            | AUG      | 1.2                     | 0.07              | Trp          | W        | UGA*                    | 11.4 | 1.93 |
|                   |              | UUU*     | 15.2                    | 1.23              |              |          | UGG                     | 0.4  | 0.07 |

**ND1**

| <b>Amino Acid</b> | <b>Codon</b> | <b>N</b>    | <b>RSCU<sup>a</sup></b> | <b>Amino Acid</b> | <b>Codon</b> | <b>N</b> | <b>RSCU<sup>a</sup></b> |      |      |
|-------------------|--------------|-------------|-------------------------|-------------------|--------------|----------|-------------------------|------|------|
| Ala               | A            | <b>GCU*</b> | 2.6                     | 3.47              |              | UUC      | 2.2                     | 0.09 |      |
|                   |              | GCC         | 0.2                     | 0.27              | Leu          | L        | <b>UUA*</b>             | 31.6 | 4.03 |
|                   |              | GCA         | 0.2                     | 0.27              |              | UUG*     | 9.4                     | 1.2  |      |
|                   |              | GCG         | 0                       | 0                 |              | CUU      | 4.6                     | 0.59 |      |
|                   |              |             |                         | CUC               |              | 0.2      | 0.03                    |      |      |
| Arg               | R            | <b>CGU*</b> | 5.2                     | 2.97              |              | CUA      | 1.2                     | 0.15 |      |
|                   |              | CGC         | 0.2                     | 0.11              |              | CUG      | 0                       | 0    |      |
|                   |              | CGA         | 0.4                     | 0.23              | Pro          | P        | <b>CCU*</b>             | 6.2  | 2.7  |
|                   |              | CGG         | 1.2                     | 0.69              |              | CCC      | 0.8                     | 0.35 |      |
| Asn               | N            | <b>AAU*</b> | 8.2                     | 1.95              |              | CCA      | 2.2                     | 0.96 |      |
|                   |              | AAC         | 0.2                     | 0.05              |              | CCG      | 0                       | 0    |      |
| Asp               | D            | <b>GAU*</b> | 5.4                     | 1.86              | Ser          | S        | <b>UCU*</b>             | 18.8 | 3.82 |
|                   |              | GAC         | 0.4                     | 0.14              |              | UCC      | 0.6                     | 0.12 |      |
| Cys               | C            | <b>UGU*</b> | 14                      | 1.92              |              | UCA*     | 5.4                     | 1.1  |      |
|                   |              | UGC         | 0.6                     | 0.08              |              | UCG      | 0.2                     | 0.04 |      |
| Gln               | Q            | CAA         | 2                       | 0.8               | AGU*         | 5.8      | 1.18                    |      |      |
|                   |              | CAG*        | 3                       | 1.2               | AGC          | 0.2      | 0.04                    |      |      |
| Clu               | E            | GAA         | 4                       | 0.8               | AGA*         | 7        | 1.42                    |      |      |
|                   |              | GAG*        | 6                       | 1.2               | AGG          | 1.4      | 0.28                    |      |      |
| Gly               | G            | <b>GGU*</b> | 8.4                     | 2.21              | Thr          | T        | <b>ACU*</b>             | 5.2  | 3.71 |
|                   |              | GGC         | 1.2                     | 0.32              |              | ACC      | 0                       | 0    |      |
|                   |              | GGA         | 2.4                     | 0.63              |              | ACA      | 0                       | 0    |      |
|                   |              | GGG         | 3.2                     | 0.84              |              | ACG      | 0.4                     | 0.29 |      |
| His               | H            | <b>CAU*</b> | 1.4                     | 2                 | Tyr          | Y        | <b>UAU*</b>             | 23.8 | 1.93 |
|                   |              | CAC         | 0                       | 0                 |              | UAC      | 0.8                     | 0.07 |      |
| Ile               | I            | <b>AUU*</b> | 24.6                    | 1.94              | Val          | V        | <b>GUU*</b>             | 11.6 | 2.61 |
|                   |              | AUC         | 0.8                     | 0.06              |              | GUC      | 1.2                     | 0.27 |      |
| Lys               | K            | AAA         | 1.4                     | 0.34              |              | GUA      | 4                       | 0.9  |      |
|                   |              | <b>AAG*</b> | 6.8                     | 1.66              |              | GUG      | 1                       | 0.22 |      |
| Met               | M            | AUA*        | 8                       | 1.57              | Trp          | W        | UGA*                    | 5    | 1.28 |
|                   |              | AUG         | 2.2                     | 0.43              |              | UGG      | 2.8                     | 0.72 |      |
| Phe               | F            | <b>UUU*</b> | 44.8                    | 1.91              |              |          |                         |      |      |

**ND2**

| <b>Amino Acid</b> | <b>Codon</b> | <b>N</b>    | <b>RSCU<sup>a</sup></b> | <b>Amino Acid</b> | <b>Codon</b> | <b>N</b>    | <b>RSCU<sup>a</sup></b> |      |      |
|-------------------|--------------|-------------|-------------------------|-------------------|--------------|-------------|-------------------------|------|------|
| Ala               | A            | <b>GCU*</b> | 3                       | 1.71              |              | UUC         | 4.6                     | 0.5  |      |
|                   |              | GCC         | 0.6                     | 0.34              | Leu          | L           | <b>UUA*</b>             | 26.2 | 3.29 |
|                   |              | <b>GCA*</b> | 3.4                     | 1.94              |              |             | UUG                     | 4.4  | 0.55 |
| Arg               | R            | GCG         | 0                       | 0                 |              | CUU         | 6                       | 0.75 |      |
|                   |              | <b>CGU*</b> | 1                       | 2                 |              | CUC         | 1.2                     | 0.15 |      |
|                   |              | CGC         | 0                       | 0                 |              | CUA*        | 9.6                     | 1.21 |      |
|                   |              | <b>CGA*</b> | 1                       | 2                 | Pro          | P           | <b>CCU*</b>             | 3    | 1.94 |
| Asn               | N            | CGG         | 0                       | 0                 |              |             | CCC                     | 0.2  | 0.13 |
|                   |              | AAU*        | 17.6                    | 1.56              |              |             | CCA*                    | 2.4  | 1.55 |
| Asp               | D            | AAC         | 5                       | 0.44              |              | CCG         | 0.6                     | 0.39 |      |
|                   |              | <b>GAU*</b> | 0.2                     | 2                 | Ser          | S           | UCU*                    | 8    | 1.52 |
| Cys               | C            | GAC         | 0                       | 0                 |              |             | UCC                     | 1.8  | 0.34 |
|                   |              | UGU*        | 0.8                     | 1.33              |              | <b>UCA*</b> | 19.8                    | 3.77 |      |
| Gln               | Q            | UGC         | 0.4                     | 0.67              |              | UCG         | 0.4                     | 0.08 |      |
|                   |              | <b>CAA*</b> | 5                       | 1.92              |              | AGU         | 3.4                     | 0.65 |      |
| Clu               | E            | CAG         | 0.2                     | 0.08              |              | AGC         | 0.8                     | 0.15 |      |
|                   |              | <b>GAA*</b> | 7.6                     | 1.9               |              | AGA*        | 7.8                     | 1.49 |      |
|                   |              | GAG         | 0.4                     | 0.1               | Thr          | T           | <b>ACU*</b>             | 6.6  | 1.81 |
| Gly               | G            | GGU         | 2.2                     | 0.94              |              |             | ACC                     | 0.8  | 0.22 |
|                   |              | GGC         | 0.8                     | 0.34              |              |             | <b>ACA*</b>             | 7.2  | 1.97 |
|                   |              | GGA*        | 3.2                     | 1.36              |              |             | ACG                     | 0    | 0    |
| His               | H            | GGG*        | 3.2                     | 1.36              |              | UAU*        | 6                       | 1.22 |      |
|                   |              | CAU         | 0.4                     | 0.67              | Tyr          | Y           | UAC                     | 3.8  | 0.78 |
| Ile               | I            | CAC*        | 0.8                     | 1.33              |              |             | <b>GUU*</b>             | 4.4  | 1.69 |
|                   |              | <b>AUU*</b> | 31.2                    | 1.68              | Val          | V           | GUC                     | 0.6  | 0.23 |
| Lys               | K            | AUC         | 6                       | 0.32              |              |             | <b>GUA*</b>             | 5.4  | 2.08 |
|                   |              | <b>AAA*</b> | 16                      | 1.84              |              | GUG         | 0                       | 0    |      |
| Met               | M            | AAG         | 1.4                     | 0.16              | Trp          | W           | <b>UGA*</b>             | 6.4  | 1.64 |
|                   |              | <b>AUA*</b> | 48.8                    | 1.82              |              |             | UGG                     | 1.4  | 0.36 |
| Phe               | F            | AUG         | 4.8                     | 0.18              |              |             |                         |      |      |
|                   |              | UUU*        | 13.8                    | 1.5               |              |             |                         |      |      |



**ND3**

| <b>Amino Acid</b> | <b>Codon</b> | <b>N</b> | <b>RSCU<sup>a</sup></b> | <b>Amino Acid</b> | <b>Codon</b> | <b>N</b> | <b>RSCU<sup>a</sup></b> |      |      |
|-------------------|--------------|----------|-------------------------|-------------------|--------------|----------|-------------------------|------|------|
| Ala               | A            | GCU      | 0.2                     | 0.33              |              | UUC      | 4                       | 0.75 |      |
|                   |              | GCC      | 0.2                     | 0.33              | Leu          | L        | UUA*                    | 9.8  | 3.46 |
|                   |              | GCA*     | 2                       | 3.33              |              |          | UUG                     | 0.6  | 0.21 |
| Arg               | R            | GCG      | 0                       | 0                 |              | CUU      | 2                       | 0.71 |      |
|                   |              | CGU*     | 0.6                     | 2.4               |              | CUC      | 0.2                     | 0.07 |      |
|                   |              | CGC      | 0.2                     | 0.8               |              | CUA*     | 4.4                     | 1.55 |      |
|                   |              | CGA      | 0.2                     | 0.8               | Pro          | P        | CUG                     | 0    | 0    |
| Asn               | N            | CGG      | 0                       | 0                 |              |          | CCU                     | 0.8  | 0.8  |
|                   |              | AAU*     | 2.8                     | 1.17              |              | CCC      | 0                       | 0    |      |
| Asp               | D            | AAC      | 2                       | 0.83              |              | CCA*     | 3.2                     | 3.2  |      |
|                   |              | GAU*     | 1.4                     | 1.4               | Ser          | S        | CCG                     | 0    | 0    |
| Cys               | C            | GAC      | 0.6                     | 0.6               |              |          | UCU*                    | 2    | 1.7  |
|                   |              | UGU*     | 0.8                     | 1.6               |              | UCC      | 0                       | 0    |      |
| Gln               | Q            | UGC      | 0.2                     | 0.4               |              | UCA*     | 3.6                     | 3.06 |      |
|                   |              | CAA*     | 1.8                     | 1.8               |              | UCG*     | 1.2                     | 1.02 |      |
| Clu               | E            | CAG      | 0.2                     | 0.2               |              | AGU      | 0.6                     | 0.51 |      |
|                   |              | GAA*     | 2.8                     | 1.87              |              | AGC      | 0                       | 0    |      |
| Gly               | G            | GAG      | 0.2                     | 0.13              |              | AGA*     | 1.8                     | 1.53 |      |
|                   |              | GGU      | 0.4                     | 0.53              | Thr          | T        | AGG                     | 0.2  | 0.17 |
|                   |              | GGC      | 0                       | 0                 |              |          | ACU*                    | 2    | 1.33 |
|                   |              | GGA*     | 2.4                     | 3.2               |              | ACC      | 0.8                     | 0.53 |      |
| His               | H            | GGG      | 0.2                     | 0.27              |              | ACA*     | 3.2                     | 2.13 |      |
|                   |              | CAU*     | 0.6                     | 1.2               |              | ACG      | 0                       | 0    |      |
| Ile               | I            | CAC      | 0.4                     | 0.8               | Tyr          | Y        | UAU*                    | 2.4  | 1.26 |
|                   |              | AUU*     | 14                      | 1.49              |              |          | UAC                     | 1.4  | 0.74 |
| Lys               | K            | AUC      | 4.8                     | 0.51              | Val          | V        | GUU*                    | 1.2  | 1.33 |
|                   |              | AAA*     | 8                       | 2                 |              |          | GUC                     | 0.2  | 0.22 |
| Met               | M            | AAG      | 0                       | 0                 |              | GUA*     | 1.8                     | 2    |      |
|                   |              | AUA*     | 12.6                    | 1.97              |              | GUG      | 0.4                     | 0.44 |      |
| Phe               | F            | AUG      | 0.2                     | 0.03              | Trp          | W        | UGA*                    | 2.6  | 1.73 |
|                   |              | UUU*     | 6.6                     | 1.25              |              |          | UGG                     | 0.4  | 0.27 |

**ND4**

| <b>Amino Acid</b> | <b>Codon</b> | <b>N</b>    | <b>RSCU<sup>a</sup></b> | <b>Amino Acid</b> | <b>Codon</b> | <b>N</b>    | <b>RSCU<sup>a</sup></b> |      |      |
|-------------------|--------------|-------------|-------------------------|-------------------|--------------|-------------|-------------------------|------|------|
| Ala               | A            | <b>GCU*</b> | 7.4                     | 3.44              |              | UUC         | 3                       | 0.08 |      |
|                   |              | GCC         | 0.2                     | 0.09              | Leu          | L           | <b>UUA*</b>             | 44   | 4.2  |
|                   |              | GCA         | 0.8                     | 0.37              |              |             | UUG                     | 9.8  | 0.94 |
|                   |              | GCG         | 0.2                     | 0.09              |              | CUU         | 6                       | 0.57 |      |
| Arg               | R            | <b>CGU*</b> | 3                       | 2.4               |              | CUC         | 0.6                     | 0.06 |      |
|                   |              | CGC         | 0.4                     | 0.32              |              | CUA         | 1.8                     | 0.17 |      |
|                   |              | CGA         | 1.2                     | 0.96              | Pro          | P           | <b>CCU*</b>             | 8.2  | 2.98 |
|                   |              | CGG         | 0.4                     | 0.32              |              |             | CCC                     | 0.8  | 0.29 |
| Asn               | N            | <b>AAU*</b> | 12.8                    | 1.94              |              | CCA         | 1.8                     | 0.65 |      |
| Asp               | D            | <b>GAU*</b> | 4.8                     | 1.78              |              | CCG         | 0.2                     | 0.07 |      |
|                   |              | GAC         | 0.6                     | 0.22              | Ser          | S           | <b>UCU*</b>             | 20.6 | 3.39 |
| Cys               | C            | <b>UGU*</b> | 15.8                    | 1.8               |              |             | UCC                     | 0.4  | 0.07 |
|                   |              | UGC         | 1.8                     | 0.2               |              | UCA         | 4.8                     | 0.79 |      |
| Gln               | Q            | CAA*        | 2                       | 1.33              |              | UCG         | 1.2                     | 0.2  |      |
|                   |              | CAG         | 1                       | 0.67              |              | <b>AGU*</b> | 15.2                    | 2.69 |      |
| Clu               | E            | GAA*        | 3.2                     | 1.07              |              | AGC         | 1                       | 0.18 |      |
|                   |              | GAG         | 2.8                     | 0.93              |              | AGA         | 2.6                     | 0.46 |      |
| Gly               | G            | <b>GGU*</b> | 15.2                    | 2.69              |              | AGG         | 3.8                     | 0.67 |      |
|                   |              | GGC         | 1                       | 0.18              | Thr          | T           | <b>ACU*</b>             | 5.2  | 2.54 |
|                   |              | GGA         | 2.6                     | 0.46              |              |             | ACC                     | 0.4  | 0.2  |
|                   |              | GGG         | 3.8                     | 0.67              |              | ACA*        | 2.2                     | 1.07 |      |
| His               | H            | <b>CAU*</b> | 7.8                     | 1.95              |              | ACG         | 0.4                     | 0.2  |      |
|                   |              | CAC         | 0.2                     | 0.05              | Tyr          | Y           | <b>UAU*</b>             | 33.8 | 1.85 |
| Ile               | I            | <b>AUU*</b> | 40                      | 1.86              |              |             | UAC                     | 2.8  | 0.15 |
|                   |              | AUC         | 3                       | 0.14              | Val          | V           | <b>GUU*</b>             | 12.8 | 2.37 |
| Lys               | K            | AAA         | 3.2                     | 0.86              |              |             | GUC                     | 0.8  | 0.15 |
|                   |              | AAG*        | 4.2                     | 1.14              |              | GUA*        | 7                       | 1.3  |      |
| Met               | M            | AUA*        | 19.4                    | 1.4               |              | GUG         | 1                       | 0.19 |      |
|                   |              | AUG         | 8.4                     | 0.6               | Trp          | W           | UGA*                    | 3.6  | 1.2  |
| Phe               | F            | <b>UUU*</b> | 71.4                    | 1.92              |              |             | UGG                     | 2.4  | 0.8  |

ND4L

| Amino Acid |   | Codon | N    | RSCU <sup>a</sup> | Amino Acid |   | Codon | N   | RSCU <sup>a</sup> |
|------------|---|-------|------|-------------------|------------|---|-------|-----|-------------------|
| Ala        | A | GCU*  | 1    | 4                 | Leu        | L | UUC   | 0.2 | 0.04              |
|            |   | GCC   | 0    | 0                 |            |   | UUA*  | 11  | 3.27              |
|            |   | GCA   | 0    | 0                 |            |   | UUG*  | 3.6 | 1.07              |
|            |   | GCG   | 0    | 0                 |            |   | CUU*  | 4.4 | 1.31              |
| Arg        | R | CGU*  | 2    | 4                 | Pro        | P | CUC   | 0   | 0                 |
|            |   | CGC   | 0    | 0                 |            |   | CUA   | 1.2 | 0.36              |
|            |   | CGA   | 0    | 0                 |            |   | CUG   | 0   | 0                 |
|            |   | CGG   | 0    | 0                 |            |   | CCU   | 0   | 0                 |
| Asn        | N | AAU*  | 2    | 2                 | Ser        | S | CCC   | 0   | 0                 |
|            |   | AAC   | 0    | 0                 |            |   | CCA   | 0   | 0                 |
| Asp        | D | GAU*  | 1.4  | 1.4               | Ser        | S | CCG   | 0   | 0                 |
|            |   | GAC   | 0.6  | 0.6               |            |   | UCU*  | 2   | 2.29              |
| Cys        | C | UGU*  | 3.8  | 1.9               | Thr        | T | UCC   | 0   | 0                 |
|            |   | UGC   | 0.2  | 0.1               |            |   | UCA*  | 2.2 | 2.51              |
| Gln        | Q | CAA   | 0    | 0                 | Tyr        | Y | UCG   | 0   | 0                 |
|            |   | CAG   | 0    | 0                 |            |   | AGU*  | 2.2 | 2.51              |
| Clu        | E | GAA*  | 1.2  | 1.2               | Val        | V | AGC   | 0.2 | 0.23              |
|            |   | GAG   | 0.8  | 0.8               |            |   | AGA   | 0   | 0                 |
| Gly        | G | GGU*  | 2.6  | 2.48              | Val        | V | AGG   | 0.4 | 0.46              |
|            |   | GGC   | 0.2  | 0.19              |            |   | ACU*  | 1   | 4                 |
|            |   | GGA   | 1    | 0.95              |            |   | ACC   | 0   | 0                 |
|            |   | GGG   | 0.4  | 0.38              |            |   | ACA   | 0   | 0                 |
| His        | H | CAU*  | 1.8  | 1.8               | Tyr        | Y | ACG   | 0   | 0                 |
|            |   | CAC   | 0.2  | 0.2               |            |   | UAU*  | 7.8 | 2                 |
| Ile        | I | AUU*  | 9    | 1.96              | Val        | V | UAC   | 0   | 0                 |
|            |   | AUC   | 0.2  | 0.04              |            |   | GUU*  | 4.6 | 3.07              |
| Lys        | K | AAA   | 0.2  | 0.4               | Trp        | W | GUC   | 0.2 | 0.13              |
|            |   | AAG*  | 0.8  | 1.6               |            |   | GUA   | 1.2 | 0.8               |
| Met        | M | AUA*  | 5.6  | 1.27              | Trp        | W | GUG   | 0   | 0                 |
|            |   | AUG   | 3.2  | 0.73              |            |   | UGA*  | 0.8 | 1.6               |
| Phe        | F | UUU*  | 10.4 | 1.96              |            |   | UGG   | 0.2 | 0.4               |

**ND5**

| <b>Amino Acid</b> | <b>Codon</b> | <b>N</b>    | <b>RSCU<sup>a</sup></b> | <b>Amino Acid</b> | <b>Codon</b> | <b>N</b> | <b>RSCU<sup>a</sup></b> |      |      |
|-------------------|--------------|-------------|-------------------------|-------------------|--------------|----------|-------------------------|------|------|
| Ala               | A            | <b>GCU*</b> | 8.2                     | 2.73              |              | UUC      | 3.4                     | 0.09 |      |
|                   |              | GCC         | 0.6                     | 0.2               | Leu          | L        | <b>UUA*</b>             | 57   | 4.09 |
|                   |              | GCA*        | 3.2                     | 1.07              |              |          | UUG                     | 13.8 | 0.99 |
| Arg               | R            | <b>CGU*</b> | 3                       | 2.4               |              | CUU      | 9.2                     | 0.66 |      |
|                   |              | CGC         | 0                       | 0                 |              | CUC      | 0.2                     | 0.01 |      |
|                   |              | CGA*        | 1.8                     | 1.44              | Pro          | P        | <b>CCU*</b>             | 4.6  | 2.3  |
|                   |              | CGG         | 0.2                     | 0.16              |              |          | CCC                     | 0.4  | 0.2  |
| Asn               | N            | <b>AAU*</b> | 23.8                    | 1.89              |              | CCA*     | 2.8                     | 1.4  |      |
| Asp               | D            | <b>GAU*</b> | 11                      | 1.77              |              | CCG      | 0.2                     | 0.1  |      |
|                   |              | GAC         | 1.4                     | 0.23              | Ser          | S        | <b>UCU*</b>             | 30.4 | 3.45 |
| Cys               | C            | <b>UGU*</b> | 14                      | 1.69              |              |          | UCC                     | 2.4  | 0.27 |
|                   |              | UGC         | 2.6                     | 0.31              |              | UCA*     | 8.8                     | 1    |      |
| Gln               | Q            | CAA*        | 3.2                     | 1.03              |              | UCG      | 1                       | 0.11 |      |
|                   |              | CAG         | 3                       | 0.97              |              | AGU*     | 13                      | 1.48 |      |
| Clu               | E            | GAA*        | 4.4                     | 1.57              |              | AGC      | 0.6                     | 0.07 |      |
|                   |              | GAG         | 1.2                     | 0.43              |              | AGA*     | 9.6                     | 1.09 |      |
| Gly               | G            | <b>GGU*</b> | 19.8                    | 2.68              |              | AGG      | 4.6                     | 0.52 |      |
|                   |              | GGC         | 0.4                     | 0.05              | Thr          | T        | <b>ACU*</b>             | 11.2 | 3.11 |
|                   |              | GGA         | 3.4                     | 0.46              |              |          | ACC                     | 1.2  | 0.33 |
|                   |              | GGG         | 6                       | 0.81              |              | ACA      | 1.6                     | 0.44 |      |
| His               | H            | <b>CAU*</b> | 5                       | 1.92              |              | ACG      | 0.4                     | 0.11 |      |
|                   |              | CAC         | 0.2                     | 0.08              | Tyr          | Y        | <b>UAU*</b>             | 50.2 | 1.82 |
| Ile               | I            | <b>AUU*</b> | 43.6                    | 1.92              |              |          | UAC                     | 5    | 0.18 |
|                   |              | AUC         | 1.8                     | 0.08              | Val          | V        | <b>GUU*</b>             | 17.4 | 2.58 |
| Lys               | K            | AAA*        | 4.6                     | 1.12              |              |          | GUC                     | 1    | 0.15 |
|                   |              | AAG         | 3.6                     | 0.88              |              | GUA*     | 7.4                     | 1.1  |      |
| Met               | M            | AUA*        | 28                      | 1.51              |              | GUG      | 1.2                     | 0.18 |      |
|                   |              | AUG         | 9.2                     | 0.49              | Trp          | W        | UGA*                    | 6.8  | 1.36 |
| Phe               | F            | <b>UUU*</b> | 76.4                    | 1.91              |              |          | UGG                     | 3.2  | 0.64 |

**ND6**

| <b>Amino Acid</b> | <b>Codon</b> | <b>N</b> | <b>RSCU<sup>a</sup></b> | <b>Amino Acid</b> | <b>Codon</b> | <b>N</b> | <b>RSCU<sup>a</sup></b> |      |      |
|-------------------|--------------|----------|-------------------------|-------------------|--------------|----------|-------------------------|------|------|
| Ala               | A            | GCU      | 0.4                     | 0.57              |              | UUC      | 1.6                     | 0.48 |      |
|                   |              | GCC      | 0                       | 0                 | Leu          | L        | UUA*                    | 12.4 | 3.51 |
|                   |              | GCA*     | 2.2                     | 3.14              |              |          | UUG                     | 1    | 0.28 |
| Arg               | R            | GCG      | 0.2                     | 0.29              |              |          | CUU                     | 2.6  | 0.74 |
|                   |              | CGU      | 0                       | 0                 |              | CUC      | 0.4                     | 0.11 |      |
|                   |              | CGC      | 0.2                     | 0.8               |              | CUA*     | 4.8                     | 1.36 |      |
|                   |              | CGA*     | 0.6                     | 2.4               | Pro          | P        | CCU*                    | 1.2  | 2.18 |
| Asn               | N            | CGG      | 0.2                     | 0.8               |              |          | CCC                     | 0.4  | 0.73 |
|                   |              | AAU*     | 2.4                     | 1.2               |              |          | CCA*                    | 0.6  | 1.09 |
| Asp               | D            | AAC      | 1.6                     | 0.8               |              | CCG      | 0                       | 0    |      |
|                   |              | GAU*     | 0.8                     | 1.33              | Ser          | S        | UCU*                    | 2.2  | 1.24 |
| Cys               | C            | GAC      | 0.4                     | 0.67              |              |          | UCC                     | 0.6  | 0.34 |
|                   |              | UGU      | 0                       | 0                 |              |          | UCA*                    | 7    | 3.94 |
| Gln               | Q            | UGC*     | 0.2                     | 2                 |              | UCG      | 0.4                     | 0.23 |      |
|                   |              | CAA*     | 3.4                     | 1.89              |              | AGU      | 0.2                     | 0.11 |      |
| Clu               | E            | CAG      | 0.2                     | 0.11              |              | AGC      | 0.2                     | 0.11 |      |
|                   |              | GAA*     | 10                      | 1.92              |              | AGA*     | 3.6                     | 2.03 |      |
|                   |              | GAG      | 0.4                     | 0.08              | Thr          | T        | AGG                     | 0    | 0    |
| Gly               | G            | GGU      | 0.4                     | 0.4               |              |          | ACU*                    | 4    | 1.31 |
|                   |              | GGC      | 0.2                     | 0.2               |              |          | ACC                     | 1.8  | 0.59 |
|                   |              | GGA*     | 3.2                     | 3.2               |              |          | ACA*                    | 6    | 1.97 |
| His               | H            | GGG      | 0.2                     | 0.2               |              | ACG      | 0.4                     | 0.13 |      |
|                   |              | CAU*     | 1.6                     | 1.6               | Tyr          | Y        | UAU*                    | 2.4  | 1.14 |
| Ile               | I            | CAC      | 0.4                     | 0.4               |              |          | UAC                     | 1.8  | 0.86 |
|                   |              | AUU*     | 20.8                    | 1.76              | Val          | V        | GUU*                    | 1.4  | 1.65 |
| Lys               | K            | AUC      | 2.8                     | 0.24              |              |          | GUC                     | 0    | 0    |
|                   |              | AAA*     | 14.4                    | 1.92              |              | GUA*     | 1.8                     | 2.12 |      |
| Met               | M            | AAG      | 0.6                     | 0.08              |              | GUG      | 0.2                     | 0.24 |      |
|                   |              | AUA*     | 28.4                    | 1.88              | Trp          | W        | UGA*                    | 1    | 2    |
| Phe               | F            | AUG      | 1.8                     | 0.12              |              |          | UGG                     | 0    | 0    |
|                   |              | UUU*     | 5                       | 1.52              |              |          |                         |      |      |

<sup>a</sup> mean values of RSCU based on the synonymous codon usage frequencies; N: Total number of preferred codon; \*RSCU>1; Yellow colour represents over-represented codon (RSCU>1.6).
